# Supplementary material for: Appropriate use of antiplatelet medications following transient ischemic attacks and stroke: a 9-year study from the Middle East
Source: Frontiers journal article supplement (doi:10.3389/fneur.2023.1269292), 2023-11-09
Supplement: Data_Sheet_1.pdf [file Data_Sheet_1.pdf]

Supplementary Table 1- Univariate short-term 90- days outcome and major cardiovascular events (MACE) in patients admitted with TIA and discharged on appropriate versus inappropriate dual antiplatelet therapy (DAPT). Significantly more “high-risk” TIA patients discharged on “appropriate” DAPT had a mRS of 0-2 at 90 days. MACE at one year was no different in the patients on appropriate and inappropriate treatment in both the high-risk and low-risk TIA patients.

| Characteristic or Investigation | Total High Risk TIA's (n=666) | Discharged on Inappropriate therapy (n=384, 57.7%) | Discharged on Appropriate Therapy (n=282, 42.3%) | P- Value | Total Low Risk TIA's (n= 691) | Discharged on Inappropriate therapy (n=238, 34.4%) | Discharged on Appropriate Therapy (453, 65.6%) | P- Value |
|---------------------------------|-------------------------------|----------------------------------------------------|--------------------------------------------------|----------|-------------------------------|----------------------------------------------------|------------------------------------------------|----------|
| <b>Prognosis – At Discharge</b> |                               |                                                    |                                                  |          |                               |                                                    |                                                |          |
| Good (mRS 0-2)                  | 616 (92.5)                    | 348 (90.6)                                         | 268 (95)                                         | 0.03     | 661 (95.7)                    | 233 (97.9)                                         | 428 (94.5)                                     | 0.04     |
| Poor (mRS 3-6)                  | 50 (7.5)                      | 36 (9.4)                                           | 14 (5)                                           |          | 30 (4.3)                      | 5 (2.1)                                            | 25 (5.5)                                       |          |
| <b>Prognosis – 90-Days</b>      |                               |                                                    |                                                  |          |                               |                                                    |                                                |          |
| Good (mRS 0-2)                  | 514 (92.1)                    | 277(88.5)                                          | 237 (96.7)                                       | <0.001   | 586 (95)                      | 212 (95.9)                                         | 374 (94.4)                                     | 0.42     |
| Poor (mRS 3-6)                  | 44 (7.9)                      | 36 (11.5)                                          | 8 (3.3)                                          |          | 31 (5)                        | 9 (4.1)                                            | 22 (5.6)                                       |          |
| <b>MACE At One Year</b>         |                               |                                                    |                                                  |          |                               |                                                    |                                                |          |
| Recurrent stroke                | 13 (2.0)                      | 6 (46.2)                                           | 7 (53.8)                                         | 0.39     | 7 (1.0)                       | 4 (57.1)                                           | 3 (42.9)                                       | 0.20     |
| Post Stroke MI                  | 5 (0.8)                       | 5 (100.0)                                          | 0                                                | 0.05     | 5 (0.7)                       | 2 (40.0)                                           | 3 (60.0)                                       | 0.79     |
| All Mortality                   | 8 (1.2)                       | 6 (75.0)                                           | 2 (25.0)                                         | 0.32     | 3 (0.4)                       | 1 (33.3)                                           | 2 (66.7)                                       | 0.97     |
| Cardiac arrest post stroke      | 1 (0.2)                       | 0                                                  | 1 (0.4)                                          | 0.24     | -                             | -                                                  | -                                              | -        |
| Post stroke (CABG or PCI)       | 4 (0.6)                       | 4 (100.0)                                          | 0                                                | 0.09     | 2 (0.3)                       | 0                                                  | 2 (100.0)                                      | 0.30     |
| Total MACE at 1 year            | 27 (4.1)                      | 18 (66.7)                                          | 9 (33.3)                                         | 0.33     | 14 (2.0)                      | 6 (42.9)                                           | 8 (57.1)                                       | 0.50     |

DAPT- Dual Antiplatelet Therapy, IV- intravenous, mRS- Modified Rankin Score, CABG- Coronary artery bypass Graft, PCI- Percutaneous Coronary Intervention, MACE- Major Cardiovascular Adverse Event

Supplementary Table 2- Univariate short-term 90-days outcome and one year major cardiovascular (MACE) in minor and non-minor stroke patients discharged on appropriate and inappropriate DAPT. The short-term and one year MACE was significantly better in patients with appropriate DAPT.

| Characteristic or Investigation | All Minor Strokes (n= 3572) | Not Discharged on Appropriate therapy (n= 2365, 66.2%) | Discharged on Appropriate Therapy (n= 1207, 33.8%) | P- Value | All non-minor Strokes (n= 3153) | Not Discharged on Appropriate therapy (n= 809, 25.7%) | Discharged on Appropriate Therapy (2344, 74.3%) | P- Value |
|---------------------------------|-----------------------------|--------------------------------------------------------|----------------------------------------------------|----------|---------------------------------|-------------------------------------------------------|-------------------------------------------------|----------|
| <b>Prognosis – At Discharge</b> |                             |                                                        |                                                    |          |                                 |                                                       |                                                 |          |
| Good (mRS 0-2)                  | 2869 (80.3)                 | 1833 (77.5)                                            | 1036 (85.8)                                        | <0.001   | 1261 (40)                       | 409 (50.6)                                            | 852 (36.3)                                      | <0.001   |
| Poor (mRS 3-6)                  | 703 (19.7)                  | 532 (22.5)                                             | 171 (14.2)                                         |          | 1892 (60)                       | 400 (49.4)                                            | 1492(63.7)                                      |          |
| <b>Prognosis – At 90-Days</b>   |                             |                                                        |                                                    |          |                                 |                                                       |                                                 |          |
| Good (mRS 0-2)                  | 2249 (85.4)                 | 1405(83.2)                                             | 844 (89.3)                                         | <0.001   | 1223 (56.1)                     | 383 (68)                                              | 840 (51.9)                                      | <0.001   |
| Poor (mRS 3-6)                  | 384 (14.6)                  | 283 (16.8)                                             | 101 (10.7)                                         |          | 957 (43.9)                      | 180 (32)                                              | 777 (48.1)                                      |          |
| <b>MACE At One Year</b>         |                             |                                                        |                                                    |          |                                 |                                                       |                                                 |          |
| Recurrent stroke                | 58 (1.6)                    | 34 (58.6)                                              | 24 (41.4)                                          | 0.23     | 50 (1.6)                        | 21 (42.0)                                             | 29 (58.0)                                       | 0.008    |
| Post Stroke MI                  | 22 (0.6)                    | 8 (36.4)                                               | 14 (63.6)                                          | 0.003    | 14 (0.4)                        | 6 (42.9)                                              | 8 (57.1)                                        | 0.14     |
| All Mortality                   | 44 (1.2)                    | 36 (81.8)                                              | 8 (18.2)                                           | 0.03     | 134 (4.2)                       | 30 (22.4)                                             | 104 (77.6)                                      | 0.37     |
| Cardiac arrest post stroke      | 8 (0.2)                     | 6 (75.0)                                               | 2 (25.0)                                           | 0.59     | 24 (0.8)                        | 7 (29.2)                                              | 7 (70.8)                                        | 0.69     |
| Post stroke (CABG or PCI)       | 19 (0.5)                    | 6 (31.6)                                               | 13 (68.4)                                          | 0.001    | 18 (0.6)                        | 8 (44.4)                                              | 10 (55.6)                                       | 0.06     |
| Total MACE at 1 year            | 129 (3.6)                   | 78 (60.5)                                              | 51 (39.5)                                          | 0.16     | 202 (6.4)                       | 58 (28.7)                                             | 144 (71.3)                                      | 0.30     |

DAPT- Dual Antiplatelet Therapy, IV- intravenous, mRS- Modified Rankin Score, CABG- Coronary artery bypass Graft, PCI- Percutaneous Coronary Intervention, MACE- Major Cardiovascular Adverse Event
